# Supplementary material for: Differential Involvement of the Dentate Gyrus in Adaptive Forgetting in the Rat
Source: PubMed Central journal article supplement (PMC4631520; doi:10.1371/journal.pone.0142065), 2015-11-03
Supplement: pone.0142065.s003.pdf [file pone.0142065.s003.pdf]

**A**

**Zif268**

| RM  | CA1         | CA3         | DG    | PFC          | LEC |
|-----|-------------|-------------|-------|--------------|-----|
| CA1 | 1           |             |       |              |     |
| CA3 | 0,42        | 1           |       |              |     |
| DG  | <b>0,67</b> | 0,467       | 1     |              |     |
| PFC | -0,1        | 0,612       | 0,006 | 1            |     |
| LEC | 0,2         | <b>0,83</b> | 0,054 | <b>0,769</b> | 1   |

  

| LIWM | CA1         | CA3          | DG    | PFC          | LEC |
|------|-------------|--------------|-------|--------------|-----|
| CA1  | 1           |              |       |              |     |
| CA3  | <b>0,86</b> | 1            |       |              |     |
| DG   | 0,69        | 0,547        | 1     |              |     |
| PFC  | 0,57        | 0,5          | 0,262 | 1            |     |
| LEC  | <b>0,93</b> | <b>0,905</b> | 0,595 | <b>0,762</b> | 1   |

  

| HIWM | CA1  | CA3   | DG    | PFC   | LEC |
|------|------|-------|-------|-------|-----|
| CA1  | 1    |       |       |       |     |
| CA3  | 0,53 | 1     |       |       |     |
| DG   | 0,64 | 0,552 | 1     |       |     |
| PFC  | 0,33 | 0,358 | 0,394 | 1     |     |
| LEC  | 0,54 | 0,612 | 0,442 | -0,01 | 1   |

  

| Control | CA1         | CA3          | DG    | PFC | LEC |
|---------|-------------|--------------|-------|-----|-----|
| CA1     | 1           |              |       |     |     |
| CA3     | <b>0,73</b> | 1            |       |     |     |
| DG      | <b>0,53</b> | <b>0,888</b> | 1     |     |     |
| PFC     | 0,17        | -0,12        | -0,02 | 1   |     |
| LEC     | -0,02       | 0,059        | 0,047 | 0,4 | 1   |

**B**

**c-Fos**

|     | CA1   | CA3          | DG          | PFC  | LEC |
|-----|-------|--------------|-------------|------|-----|
| CA1 | 1     |              |             |      |     |
| CA3 | 0,224 | 1            |             |      |     |
| DG  | 0,127 | 0,576        | 1           |      |     |
| PFC | -0,03 | <b>0,709</b> | <b>0,71</b> | 1    |     |
| LEC | 0,071 | 0,5          | 0,45        | 0,12 | 1   |

  

|     | CA1          | CA3   | DG   | PFC         | LEC |
|-----|--------------|-------|------|-------------|-----|
| CA1 | 1            |       |      |             |     |
| CA3 | <b>0,762</b> | 1     |      |             |     |
| DG  | -0,29        | 0,238 | 1    |             |     |
| PFC | 0,286        | 0,476 | 0,33 | 1           |     |
| LEC | 0,238        | 0,428 | 0,24 | <b>0,81</b> | 1   |

  

|     | CA1   | CA3   | DG   | PFC | LEC |
|-----|-------|-------|------|-----|-----|
| CA1 | 1     |       |      |     |     |
| CA3 | 0,624 | 1     |      |     |     |
| DG  | 0,454 | 0,624 | 1    |     |     |
| PFC | 0,366 | 0,25  | 0,33 | 1   |     |
| LEC | 0,115 | 0,333 | 0,59 | 0,6 | 1   |

  

|     | CA1          | CA3   | DG          | PFC  | LEC |
|-----|--------------|-------|-------------|------|-----|
| CA1 | 1            |       |             |      |     |
| CA3 | <b>0,553</b> | 1     |             |      |     |
| DG  | 0,286        | 0,107 | 1           |      |     |
| PFC | -0,56        | -0,57 | 0,34        | 1    |     |
| LEC | 0,126        | 0,016 | <b>0,74</b> | 0,29 | 1   |
